# Supplementary material for: Awareness, Treatment, and Control of LDL Cholesterol Are Lower Among U.S. Adults With Undiagnosed Diabetes Versus Diagnosed Diabetes
Source: Oxford University Press journal article supplement (doi:10.2337/dc12-2318), 2013-05-02
Supplement: dc122318supplementarydata.pdf [file dc122318supplementarydata.pdf]

SUPPLEMENTARY DATA

**Supplementary Table 1.** Criteria for High LDL-cholesterol and LDL-cholesterol Control in Individuals Without Coronary Heart Disease or Coronary Heart Disease Risk Equivalents other than Diabetes as Defined by the 2004 Updated Adult Treatment Panel III Guidelines [11].

|                                            | <b>High LDL-C</b>                                       | <b>Control</b>   |
|--------------------------------------------|---------------------------------------------------------|------------------|
| <b>Diabetes</b>                            | LDL-C $\geq$ 100 mg/dL or use of lipid-lowering therapy | LDL-C <100 mg/dL |
| <b>2+ CHD risk factors and</b>             |                                                         |                  |
| <b>10 year Framingham risk of 10 – 20%</b> | LDL-C $\geq$ 100 mg/dL or use of lipid-lowering therapy | LDL-C <100 mg/dL |
| <b>10 year Framingham risk &lt; 10%</b>    | LDL-C $\geq$ 130 mg/dL or use of lipid-lowering therapy | LDL-C <130 mg/dL |
| <b>&lt;2 CHD risk factors</b>              | LDL-C $\geq$ 160 mg/dL or use of lipid-lowering therapy | LDL-C <160 mg/dL |

LDL-C=low-density lipoprotein cholesterol; CHD=coronary heart disease

CHD risk factors include older age ( $\geq$ 55 years for women and  $\geq$ 45 years for men), current cigarette smoking, hypertension, family history of CHD (history of myocardial infarction or angina before age 50 years among first-degree relatives), and low high density lipoprotein cholesterol (HDL-C). HDL-C  $\geq$  60 mg/dL is considered protective and offsets the presence of one these risk factors.

SUPPLEMENTARY DATA

**Supplementary Figure 1.** Selection of Participants for the Current Analysis Among NHANES Participants from 2005 to 2010.

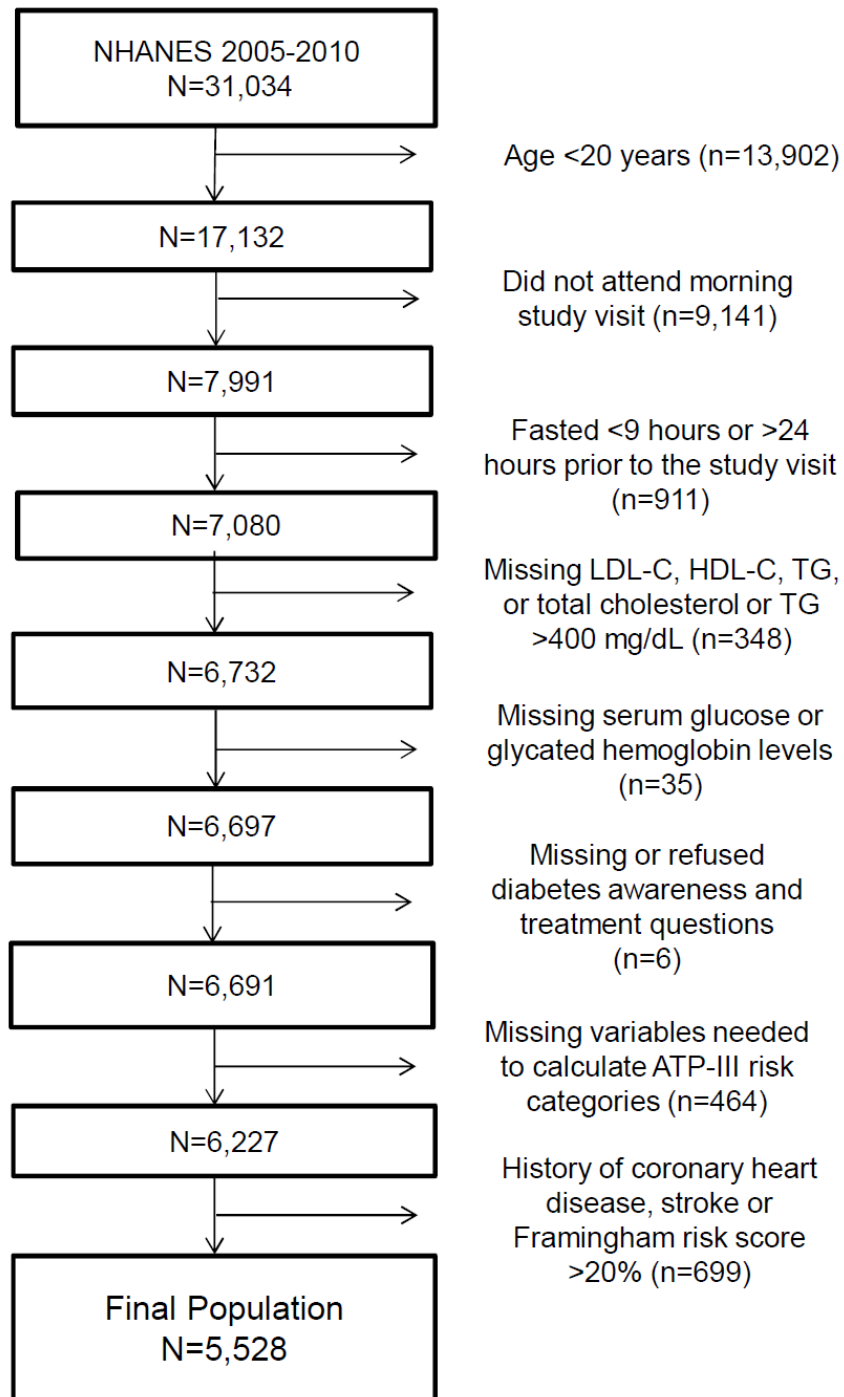

ATP=Adult Treatment Panel, HDL=high density lipoprotein, LDL=low density lipoprotein, TG=triglycerides
